# Supplementary material
Source: Elsevier journal article supplement (https://rcastoragev2.blob.core.windows.net/6af0e4fed401ad08204e94ebadf71c15/mmc1.pdf)
Supplement: mmc1 [file mmc1.pdf]

**Supplemental information**

**Astrocytes mediate cell non-autonomous correction  
of aberrant firing in human FXS neurons**

**Shreya Das Sharma, Bharath Kumar Reddy, Rakhi Pal, Tuula E. Ritakari, James D. Cooper, Bhuvaneish T. Selvaraj, Peter C. Kind, Siddharthan Chandran, David J.A. Wyllie, and Sumantra Chattarji**

## Supplemental Information

### Astrocytes mediate cell non-autonomous correction of aberrant firing in human FXS neurons

Shreya Das Sharma<sup>1,2,3,4,5#</sup>, Bharath Kumar Reddy<sup>1,3#</sup>, Rakhi Pal<sup>1,3#</sup>, Tuula E. Ritakari<sup>4,5</sup>, James D. Cooper<sup>4,5</sup>, Bhuvaneish T Selvaraj<sup>4,5</sup>, Peter C. Kind<sup>3,6,7,8</sup>, Siddharthan Chandran<sup>3,4,5,7,8</sup>, David J. A. Wyllie<sup>3,6,7,8\*</sup> and Sumantra Chattarji<sup>1,3,7,8,\*</sup>.

#### Affiliations:

<sup>1</sup> National Centre for Biological Sciences, Tata Institute for Fundamental Research, Bangalore, 560065, India

<sup>2</sup> University of Trans-Disciplinary Health Science and Technology, Bangalore, 560064, India

<sup>3</sup> Centre for Brain Development and Repair, Institute for Stem Cell Biology and Regenerative Medicine, Bangalore, 560065, India

<sup>4</sup> Centre for Clinical Brain Sciences, Chancellor's Building, University of Edinburgh, Edinburgh EH16 4SB, UK

<sup>5</sup> UK Dementia Research Institute at the University of Edinburgh, Chancellor's Building, Edinburgh Medical School, Edinburgh EH16 4SB, UK

<sup>6</sup> Centre for Discovery Brain Sciences, Hugh Robson Building, University of Edinburgh, Edinburgh, EH8 9XD, UK

<sup>7</sup> Patrick Wild Centre, Hugh Robson Building, University of Edinburgh, Edinburgh EH8 9XD, UK

<sup>8</sup> Simons Initiative for the Developing Brain, Hugh Robson Building, University of Edinburgh, Edinburgh EH8 9XD, UK

# equal contribution

#### \* Corresponding authors:

David J. A. Wyllie  
Centre for Discovery Brain Sciences,  
Hugh Robson Building  
University of Edinburgh  
Edinburgh, EH8 9XD, UK  
[david.j.a.wyllie@ed.ac.uk](mailto:david.j.a.wyllie@ed.ac.uk)

Sumantra Chattarji  
National Centre for Biological Sciences  
Tata Institute for Fundamental Research  
Bangalore 560065  
India  
[shona@ncbs.res.in](mailto:shona@ncbs.res.in)

**Figure S1**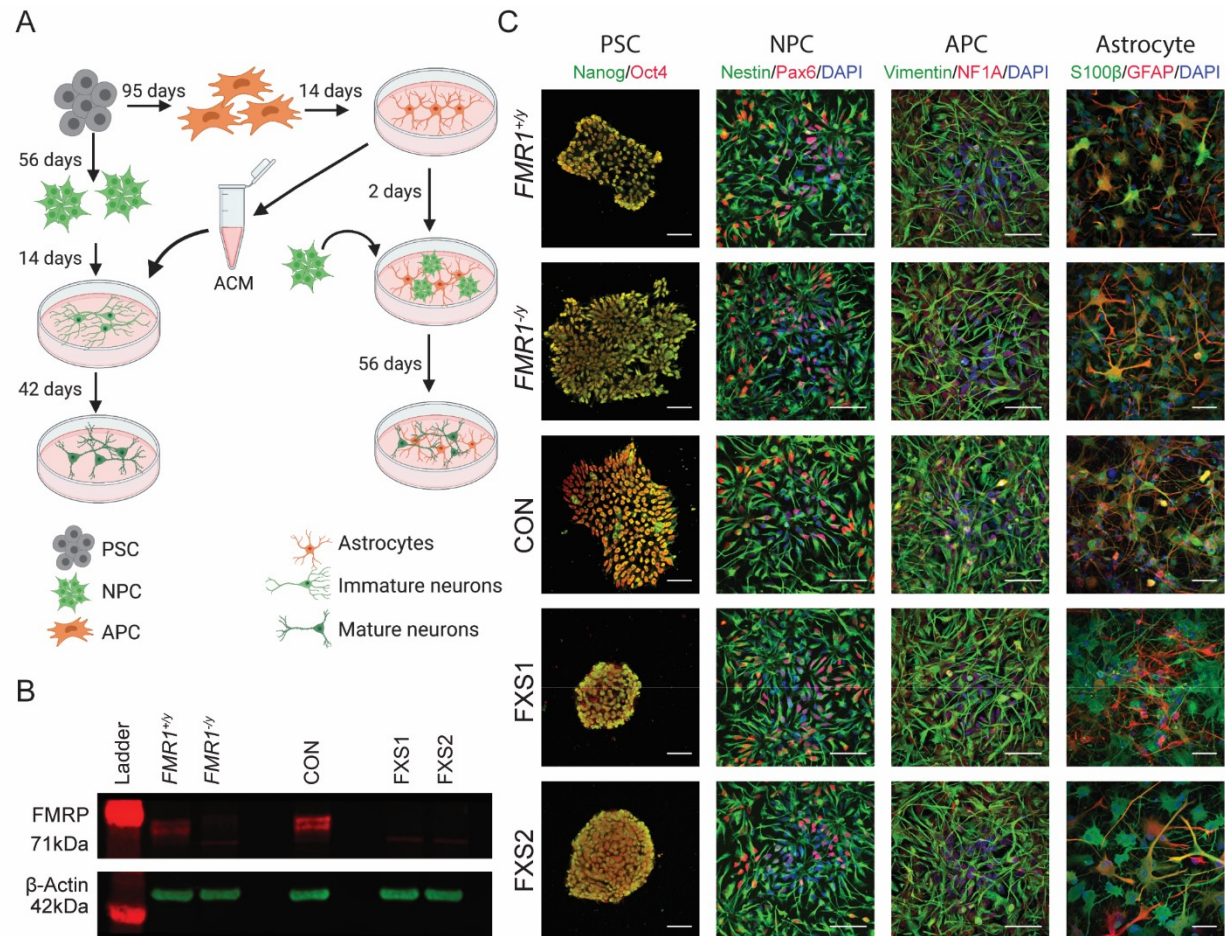

**Derivation of neurons and astrocytes from human pluripotent stem cells. (A)** A Schematic protocol (described in 'Methods') for differentiation and co-culture of neurons and astrocytes from human pluripotent stem cells. **(B)** Western blot analysis of FMRP expression from pluripotent stem cell lines illustrates  $FMR1^{+/y}$  and CON expressing FMRP and absence of FMRP in  $FMR1^{-/y}$ , FXS1, and FXS2 lines. **(C)** Left to right panel: Representative immunofluorescent images expressing pluripotent markers Nanog and Oct4. Immunofluorescent staining of neural precursor cells (NPC) expressing Nestin and Pax6. Representative images of astrocyte precursor cells (APC) expressing Vimentin and NFIA. Right panel illustrates pluripotent stem cell-derived astrocytes expressing S100 $\beta$  and GFAP. Cells were co-labeled with nuclear marker DAPI. Scale bar 50  $\mu$ m.

Figure S2

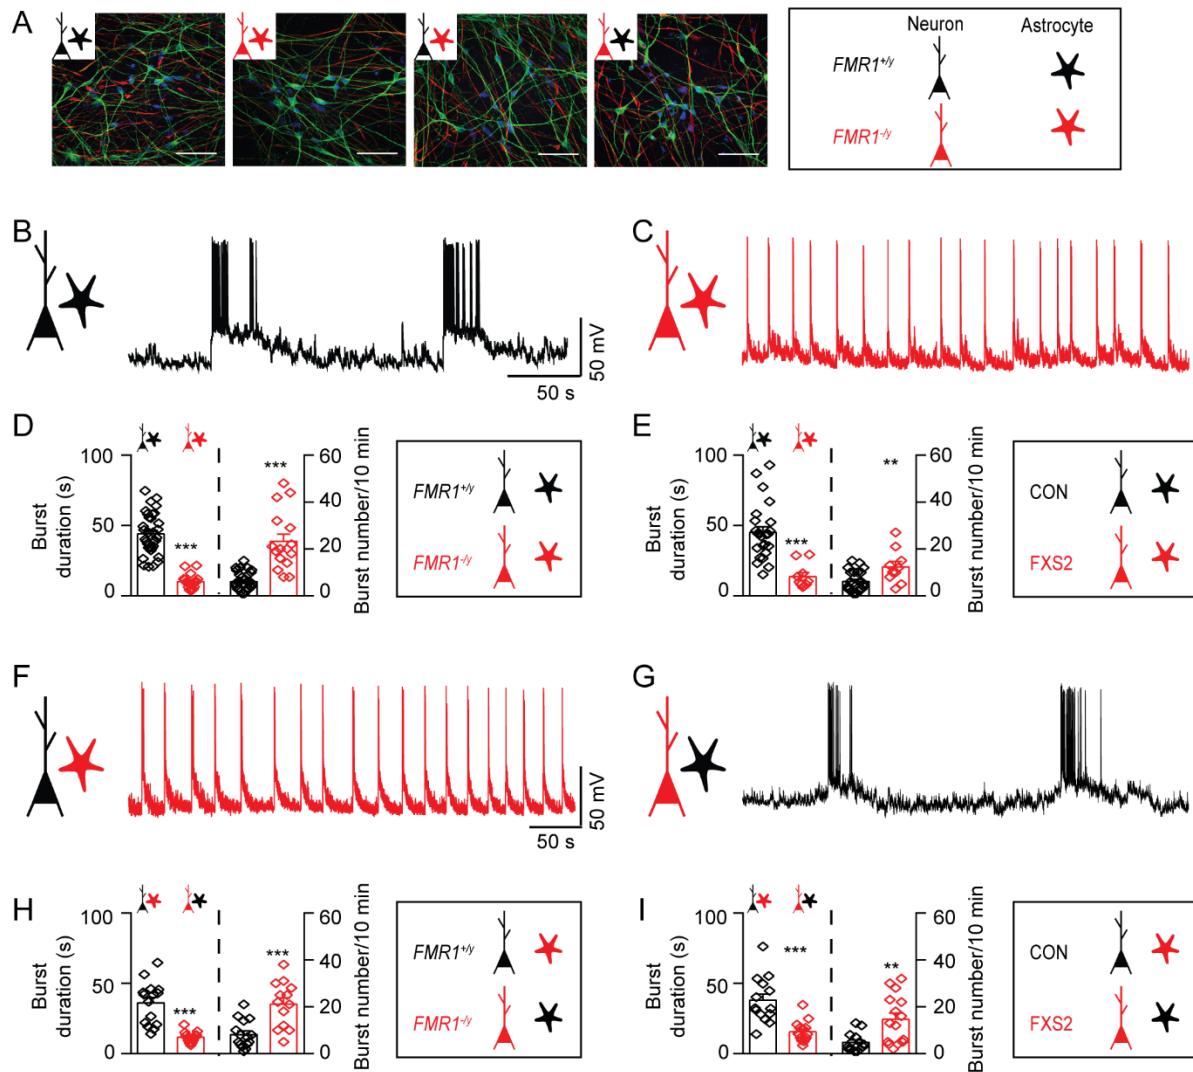

**For both iPSC and ESC derived lines distinct patterns of bursting activity of hPSC-derived cortical neurons is determined by the genotype of the astrocyte (A)** Representative confocal images of hESC-derived cortical neurons ( $FMR1^{+/y}$  and  $FMR1^{-/y}$ ) expressing Map2ab co-cultured with hESC derived astrocytes expressing GFAP. *Left to right*, neurons were co-cultured in four combinations:  $FMR1^{+/y}$  neurons with  $FMR1^{-/y}$  astrocytes,  $FMR1^{-/y}$  neurons with  $FMR1^{-/y}$  astrocytes,  $FMR1^{-/y}$  neurons with  $FMR1^{+/y}$  astrocytes, and  $FMR1^{+/y}$  neurons with  $FMR1^{-/y}$  astrocytes. *Right*, legend for icons. Scale bar = 50  $\mu$ m. **(B)** Representative current-clamp recording ( $V_{HOLD} = -70$  mV) from a  $FMR1^{+/y}$  neuron, co-cultured with  $FMR1^{+/y}$  astrocyte, firing spontaneous bursts of action potentials occurring at low frequencies but with longer durations. **(C)** Representative current-clamp recording of aberrant spontaneous activity in a  $FMR1^{-/y}$  neuron, co-cultured with  $FMR1^{-/y}$  astrocyte, containing a significantly higher number of bursts, but of shorter duration. **(D)** Comparison of mean burst duration of neurons and astrocytes co-cultures derived from ESC ( $FMR1^{+/y}$  neurons with  $FMR1^{+/y}$  astrocytes,  $44.1 \pm 2.58$  s,  $n = 33$ ,  $N = 4$ ;  $FMR1^{-/y}$  neurons with  $FMR1^{-/y}$  astrocytes,  $10.13 \pm 1.4$  s,  $n = 16$ ,  $N = 3$ ) and mean burst number per 10 min of recording ( $FMR1^{+/y}$  neurons with  $FMR1^{+/y}$  astrocytes,  $6.03 \pm 0.65$ ;  $FMR1^{-/y}$  neurons with  $FMR1^{-/y}$  astrocytes,  $23.25 \pm 3.116$ ). **(E)**

Comparison of mean burst duration of neurons and astrocytes cocultures derived from iPSC (CON neurons with CON astrocytes,  $45.19 \pm 4.065$  s,  $n = 24$ ,  $N = 4$ ; FXS2 neurons with FXS2 astrocytes,  $13.81 \pm 2.71$  s,  $n = 10$ ,  $N = 3$ ) and mean burst number per 10 min of recording (CON neurons with CON astrocytes,  $6.167 \pm 0.89$ ; FXS2 neurons with FXS2 astrocytes,  $12.4 \pm 2.28$ ). **(F)** Representative trace from a *FMR1*<sup>-/-</sup> neuron, co-cultured with *FMR1*<sup>+/-</sup> astrocyte, exhibits a normal activity with low burst number and longer burst duration. **(G)** Conversely, a *FMR1*<sup>+/-</sup> neuron, co-cultured with *FMR1*<sup>-/-</sup> astrocyte, shows aberrant activity containing higher number of bursts of duration. **(H)** Comparison of mean burst duration (*FMR1*<sup>-/-</sup> neurons with *FMR1*<sup>+/-</sup> astrocytes,  $36.02 \pm 3.93$  s,  $n = 15$ ,  $N = 3$ ; *FMR1*<sup>+/-</sup> neurons with *FMR1*<sup>-/-</sup> astrocytes,  $11.81 \pm 1.108$  s,  $n = 13$ ,  $N = 3$ ) and mean burst number per 10 min of recording (*FMR1*<sup>-/-</sup> neurons with *FMR1*<sup>+/-</sup> astrocytes,  $8.2 \pm 1.51$ ; *FMR1*<sup>+/-</sup> neurons with *FMR1*<sup>-/-</sup> astrocytes,  $21.15 \pm 2.7$ ). **(I)** Comparison of mean burst duration of neurons and astrocytes cocultures derived from iPSC (FXS2 neurons with CON astrocytes,  $38.03 \pm 4.39$  s,  $n = 14$ ,  $N = 3$ ; CON neurons with FXS2 astrocytes,  $15.62 \pm 1.89$  s,  $n = 15$ ,  $N = 3$ ) and mean burst number per 10 min of recording (FXS2 neurons with CON astrocytes,  $4.86 \pm 1.032$ ; CON neurons with FXS2 astrocytes,  $14.67 \pm 2.68$ ). \*\*\* $p < 0.001$ , \*\* $p < 0.01$ , unpaired *t*-test, Mann-Whitney test. All values are mean  $\pm$  SEM.

**Figure S3**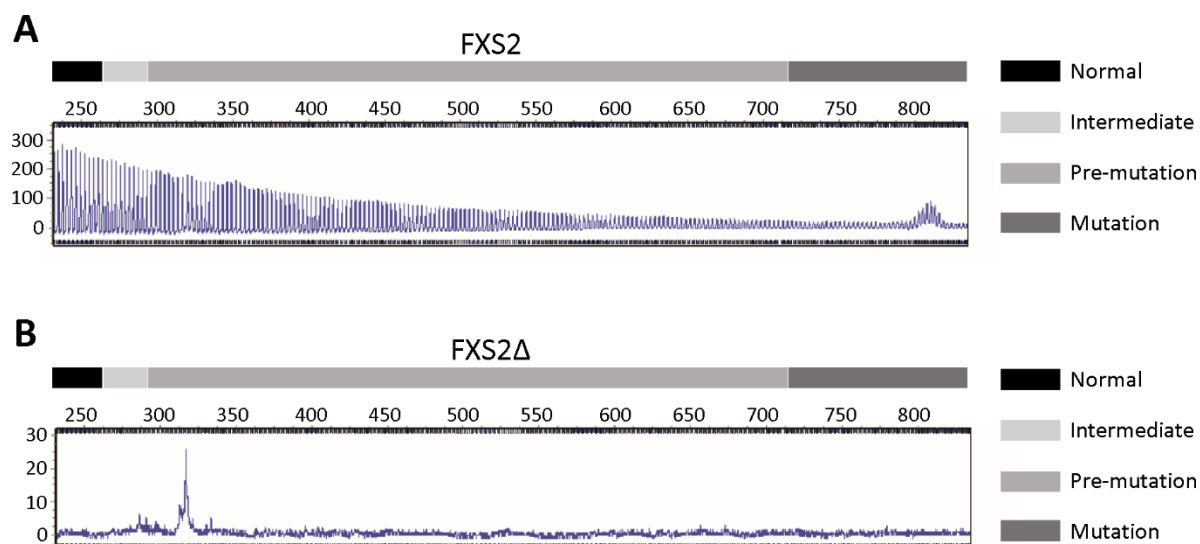

**The CGG repeats are absent after gene correction. (A, B)** Triplet repeat prime PCR in FXS2 line and its edit (FXS2Δ) shows the absence of the 5'UTR repeat in the edited line.

Figure S4

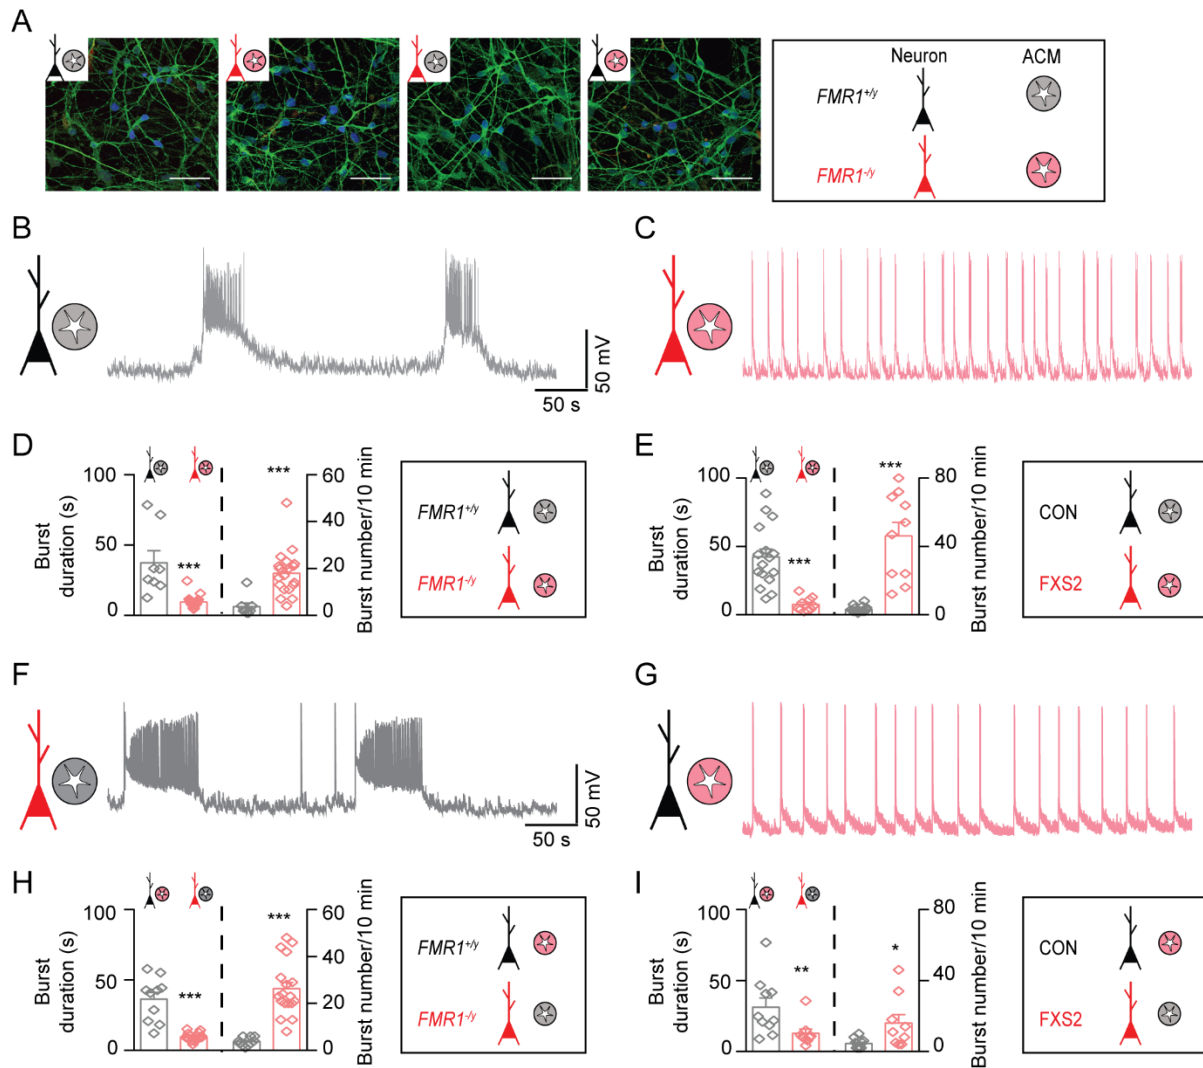

**For both iPSC and ESC derived lines the bursting activity of hPSC-derived cortical neurons is determined by the genotype of the astrocyte secretome.** (A) Representative confocal images of Map2ab-expressing hESC-derived cortical neurons ( $FMR1^{+/y}$  and  $FMR1^{-/y}$ ) grown in astrocytic conditioned media (ACM). Left to right, neurons were grown in ACM in four combinations:  $FMR1^{+/y}$  neurons with  $FMR1^{+/y}$  ACM,  $FMR1^{-/y}$  neurons with  $FMR1^{+/y}$  ACM,  $FMR1^{-/y}$  neurons with  $FMR1^{-/y}$  ACM, and  $FMR1^{+/y}$  neurons with  $FMR1^{-/y}$  ACM. Right, legend for icons. Scale bar = 50  $\mu$ m. (B) Recording from a  $FMR1^{+/y}$  neuron, grown in  $FMR1^{+/y}$  ACM, exhibits normal firing consisting of a low number of longer bursts. (C) Recording from  $FMR1^{-/y}$  neuron grown in  $FMR1^{-/y}$  ACM shows a high number of bursts of shorter duration. (D) Comparison of mean burst duration ( $FMR1^{+/y}$  neurons in  $FMR1^{+/y}$  ACM,  $37.47 \pm 8.55$  s,  $n = 8$ ,  $N = 2$ ;  $FMR1^{-/y}$  neurons in  $FMR1^{-/y}$  ACM,  $9.602 \pm 1.033$  s,  $n = 19$ ,  $N = 3$ ) and mean burst number per 10 min of recording ( $FMR1^{+/y}$  neurons in  $FMR1^{+/y}$  ACM,  $3.75 \pm 1.52$ ;  $FMR1^{-/y}$  neurons in  $FMR1^{-/y}$  ACM,  $17.95 \pm 2.245$ ). (E) Comparison of mean burst duration of neurons and astrocytes cocultures derived from iPSC (CON neurons with CON ACM,  $42.49 \pm 5.65$  s,  $n = 16$ ,  $N = 3$ ; FXS2 neurons with FXS2 ACM,  $7.52 \pm 1.56$  s,  $n = 10$ ,  $N = 3$ ) and mean burst number per 10 min

of recording (CON neurons with CON ACM,  $3.2 \pm 0.46$ ; FXS2 neurons with FXS2 ACM,  $46.2 \pm 8.009$ ). **(F)** Representative recording from a *FMR1*<sup>-/-</sup> neuron, grown in *FMR1*<sup>+/-</sup> ACM, exhibiting control burst firing, i.e., less frequent bursts of longer duration. Thus, control ACM exerts a non-cell autonomous effect in reversing aberrant FXS bursting. **(G)** Representative recording from a *FMR1*<sup>+/-</sup> ACM neuron, grown in *FMR1*<sup>-/-</sup> ACM, shows the aberrant FXS bursting. **(H)** Comparison of mean burst duration (*FMR1*<sup>-/-</sup> neurons in *FMR1*<sup>+/-</sup> ACM,  $36.37 \pm 4.94$  s, n = 10, N = 3; *FMR1*<sup>+/-</sup> neurons in *FMR1*<sup>-/-</sup> ACM,  $9.55 \pm 0.64$  s, n = 18, N = 3) and mean burst number per 10 min of recording (*FMR1*<sup>-/-</sup> neurons in *FMR1*<sup>+/-</sup> ACM,  $3.7 \pm 0.59$ ; *FMR1*<sup>+/-</sup> neurons in *FMR1*<sup>-/-</sup> ACM,  $26.33 \pm 2.77$ ). **(I)** Comparison of mean burst duration of neurons with ACM cultures derived from iPSC (FXS2 neurons with CON ACM,  $31.29 \pm 6.5$  s, n = 10, N = 3; CON neurons with FXS2 ACM,  $12.76 \pm 3.02$  s, n = 9, N = 2) and mean burst number per 10 min of recording (FXS2 neurons with CON ACM,  $4.4 \pm 0.92$ ; CON neurons with FXS2 ACM,  $16 \pm 4.9$ ). \*\*\**p* < 0.001, \*\**p* < 0.01, \**p* < 0.01, unpaired *t*-test, Mann-Whitney test. All values are mean  $\pm$  SEM.

**Table S1.** Cell line details

| ID in manuscript           | ID at source             | Age (years) | Sex | Reprogrammed cell line name  | Reprogramming method | Starting cell type  | G band karyotype |
|----------------------------|--------------------------|-------------|-----|------------------------------|----------------------|---------------------|------------------|
| CON                        | ND30625                  | 76          | M   | CS25iCTR-18n6                | Episomal vectors     | Fibroblast          | Normal           |
| FXS1                       | GM05848                  | 4           | M   | CS848iFXS-n5                 | Episomal vectors     | Fibroblast          | Normal           |
| FXS2                       | GM07072                  | 22          | M   | CS072iFXS-n4                 | Episomal vectors     | Fibroblast          | Normal           |
| <i>FMR1</i> <sup>+/-</sup> | Shef 4                   | n/a         | M   | Shef 4                       | n/a                  | Embryonic stem cell | Normal           |
| <i>FMR1</i> <sup>-/-</sup> | Shef 4- <i>FMR1</i> null | n/a         | M   | Shef 4- <i>FMR1</i> null     | n/a                  | Embryonic stem cell | Normal           |
| FXS2Δ                      | n/a                      | 22          | M   | CS072iFXS-n4 (Parental line) | Episomal vectors     | Fibroblast          | Normal           |



**Table S2.** Intrinsic electrophysiological properties: CON, FXS1

|                                 | CON neurons<br>CON astrocytes | FXS1 neurons<br>FXS1 astrocytes | CON neurons<br>FXS1 astrocytes | FXS1 neurons<br>CON astrocytes |
|---------------------------------|-------------------------------|---------------------------------|--------------------------------|--------------------------------|
| Number of cells                 | 23                            | 12                              | 11                             | 12                             |
| Resting membrane potential (mV) | -52.23 ± 1.13                 | -54.08 ± 1.24                   | -56.96 ± 2.08                  | -57.09 ± 2.21                  |
| Input Resistance (GΩ)           | 1.04 ± 0.09                   | 0.97 ± 0.17                     | 1.3 ± 0.13                     | 1.06 ± 0.14                    |
| Capacitance (pF)                | 31.19 ± 1.68                  | 42.9 ± 6.01                     | 33.12 ± 3.23                   | 33.86 ± 3.95                   |
| Rheobase (pA)                   | 18.04 ± 2.28                  | 20 ± 3.05                       | 17.86 ± 2.44                   | 20 ± 3.01                      |
| Spike amplitude (mV)            | 68.03 ± 3.18                  | 66.22 ± 5.3                     | 64.95 ± 3.10                   | 62.74 ± 4.21                   |
| Spike half-width (ms)           | 3.11 ± 0.19                   | 3.1 ± 0.26                      | 2.74 ± 0.25                    | 3.26 ± 0.34                    |
| Max no. of spikes fired         | 5.87 ± 0.6                    | 5.16 ± 0.92                     | 4.61 ± 0.84                    | 4.93 ± 1                       |

**Table S3.** Intrinsic electrophysiological properties: CON, FXS2

|                                 | CON neurons<br>CON astrocytes | FXS2 neurons<br>FXS2 astrocytes | CON neurons<br>FXS2 astrocytes | FXS2 neurons<br>CON astrocytes |
|---------------------------------|-------------------------------|---------------------------------|--------------------------------|--------------------------------|
| Number of cells                 | 23                            | 12                              | 15                             | 14                             |
| Resting membrane potential (mV) | -52.23 ± 1.13                 | -54.85 ± 2.11                   | -52.66 ± 1.84                  | -52.17 ± 2.31                  |
| Input Resistance (GΩ)           | 1.04 ± 0.09                   | 1.13 ± 0.15                     | 1.16 ± 0.14                    | 1.16 ± 0.11                    |
| Capacitance (pF)                | 31.12 ± 1.68                  | 27.55 ± 2.42                    | 30.23 ± 3.44                   | 32.5 ± 3.86                    |
| Rheobase (pA)                   | 18.04 ± 2.28                  | 20 ± 3.43                       | 21.67 ± 3.54                   | 17.86 ± 2.8                    |
| Spike amplitude (mV)            | 68.03 ± 3.18                  | 61.7 ± 4.9                      | 66.08 ± 2.35                   | 59.42 ± 3.5                    |
| Spike half-width (ms)           | 3.11 ± 0.19                   | 3.36 ± 0.27                     | 3.17 ± 0.18                    | 2.99 ± 0.22                    |
| Max no. of spikes fired         | 5.87 ± 0.6                    | 4.5 ± 0.84                      | 5.8 ± 0.75                     | 6.5 ± 0.66                     |

**Table S4.** Intrinsic electrophysiological properties: *FMR1*<sup>+/y</sup>, *FMR1*<sup>-/y</sup>

|                                 | <i>FMR1</i> <sup>+/y</sup> neurons<br><i>FMR1</i> <sup>+/y</sup> astrocytes | <i>FMR1</i> <sup>-/y</sup> neurons<br><i>FMR1</i> <sup>-/y</sup> astrocytes | <i>FMR1</i> <sup>+/y</sup> neurons<br><i>FMR1</i> <sup>-/y</sup> astrocytes | <i>FMR1</i> <sup>-/y</sup> neurons<br><i>FMR1</i> <sup>+/y</sup> astrocytes |
|---------------------------------|-----------------------------------------------------------------------------|-----------------------------------------------------------------------------|-----------------------------------------------------------------------------|-----------------------------------------------------------------------------|
| Number of cells                 | 23                                                                          | 11                                                                          | 10                                                                          | 12                                                                          |
| Resting membrane potential (mV) | -50.2 ± 1.61                                                                | -51.66 ± 2.47                                                               | -50.66 ± 3.13                                                               | -56.11 ± 1.34                                                               |
| Input Resistance (GΩ)           | 1.06 ± 0.07                                                                 | 1.5 ± 0.16                                                                  | 1.34 ± 0.2                                                                  | 1.35 ± 0.17                                                                 |
| Capacitance (pF)                | 37.33 ± 1.98                                                                | 30.6 ± 3.22                                                                 | 25.94 ± 2.08                                                                | 33.9 ± 2.77                                                                 |
| Rheobase (pA)                   | 17.61 ± 1.93                                                                | 16.82 ± 2.72                                                                | 13 ± 3                                                                      | 20 ± 3.53                                                                   |
| Spike amplitude (mV)            | 65.11 ± 2.26                                                                | 52.86 ± 3.43                                                                | 62.21 ± 3.35                                                                | 64.14 ± 3.13                                                                |
| Spike half-width (ms)           | 3.24 ± 0.2                                                                  | 3.84 ± 0.28                                                                 | 2.97 ± 0.22                                                                 | 3.66 ± 0.16                                                                 |
| Max no. of spikes fired         | 7.09 ± 0.78                                                                 | 5.9 ± 0.84                                                                  | 5.9 ± 1.17                                                                  | 7.5 ± 1.01                                                                  |

**Table S5.** Intrinsic electrophysiological properties when cultured in presence of ACM: CON, FXS1

|                                 | CON neurons<br>CON ACM | FXS neurons<br>FXS1 ACM | CON neurons<br>FXS1 astrocytes | FXS1 neurons<br>CON astrocytes |
|---------------------------------|------------------------|-------------------------|--------------------------------|--------------------------------|
| Number of cells                 | 11                     | 11                      | 11                             | 10                             |
| Resting membrane potential (mV) | -53.07 ± 3.12          | -58.02 ± 2.3            | -55 ± 2.32                     | -58 ± 2.06                     |
| Input Resistance (GΩ)           | 1.37 ± 0.13            | 1.56 ± 0.19             | 1.44 ± 0.25                    | 1.21 ± 0.16                    |
| Capacitance (pF)                | 27.54 ± 2.51           | 25.39 ± 2.96            | 41.16 ± 4.6                    | 36.86 ± 7.9                    |
| Rheobase (pA)                   | 20 ± 1.9               | 17.27 ± 1.95            | 18.18 ± 2.8                    | 21.5 ± 3.42                    |
| Spike amplitude (mV)            | 57.38 ± 3.8            | 64.23 ± 5.97            | 58.95 ± 2.74                   | 65.35 ± 4.39                   |
| Spike half-width (ms)           | 3.91 ± 0.5             | 3.86 ± 0.38             | 3.42 ± 0.15                    | 3.61 ± 0.27                    |
| Max no. of spikes fired         | 5.5 ± 0.95             | 6.3 ± 1.06              | 5.18 ± 0.76                    | 5.3 ± 0.85                     |

**Table S6.** Intrinsic electrophysiological properties when cultured in presence of ACM: CON, FXS2

|                                 | CON neurons<br>CON ACM | FXS2 neurons<br>FXS2 ACM | CON neurons<br>FXS2 astrocytes | FXS2 neurons<br>CON astrocytes |
|---------------------------------|------------------------|--------------------------|--------------------------------|--------------------------------|
| Number of cells                 | 11                     | 11                       | 11                             | 10                             |
| Resting membrane potential (mV) | -53.07 ± 3.12          | -53.83 ± 2.36            | -54.5 ± 2.83                   | -52.97 ± 2.63                  |
| Input Resistance (GΩ)           | 1.37 ± 0.13            | 1.07 ± 0.17              | 1.3 ± 0.16                     | 1.35 ± 0.15                    |
| Capacitance (pF)                | 27.54 ± 2.51           | 38.99 ± 5.28             | 33.13 ± 2.32                   | 33.7 ± 4.9                     |
| Rheobase (pA)                   | 20 ± 1.9               | 22.5 ± 4.23              | 25 ± 3.09                      | 15.91 ± 2.76                   |
| Spike amplitude (mV)            | 57.38 ± 3.8            | 67.35 ± 5.05             | 60.88 ± 3.5                    | 64.67 ± 3.83                   |
| Spike half-width (ms)           | 3.91 ± 0.5             | 3.13 ± 0.31              | 3.72 ± 0.3                     | 3.39 ± 0.31                    |
| Max no. of spikes fired         | 5.5 ± 0.95             | 6.18 ± 0.97              | 4.45 ± 0.47                    | 5.36 ± 0.78                    |

**Table S7.** Intrinsic electrophysiological properties when cultured in presence of ACM: *FMR1*<sup>+/y</sup>, *FMR1*<sup>-/y</sup>

|                                 | <i>FMR1</i> <sup>+/y</sup> neurons<br><i>FMR1</i> <sup>+/y</sup> ACM | <i>FMR1</i> <sup>-/y</sup> neurons<br><i>FMR1</i> <sup>-/y</sup> ACM | <i>FMR1</i> <sup>+/y</sup> neurons<br><i>FMR1</i> <sup>-/y</sup> astrocytes | <i>FMR1</i> <sup>-/y</sup> neurons<br><i>FMR1</i> <sup>+/y</sup> astrocytes |
|---------------------------------|----------------------------------------------------------------------|----------------------------------------------------------------------|-----------------------------------------------------------------------------|-----------------------------------------------------------------------------|
| Number of cells                 | 12                                                                   | 18                                                                   | 17                                                                          | 10                                                                          |
| Resting membrane potential (mV) | -52.43 ± 2.35                                                        | -57.99 ± 1.73                                                        | -54.51 ± 1.21                                                               | -50.81 ± 2.96                                                               |
| Input Resistance (GΩ)           | 1.36 ± 0.19                                                          | 1.35 ± 0.13                                                          | 1.19 ± 0.13                                                                 | 1.48 ± 0.21                                                                 |
| Capacitance (pF)                | 32.96 ± 3.34                                                         | 35.07 ± 1.76                                                         | 33.38 ± 2.32                                                                | 32.54 ± 2.76                                                                |
| Rheobase (pA)                   | 23.75 ± 2.47                                                         | 26.4 ± 2.41                                                          | 20.6 ± 1.7                                                                  | 23.5 ± 4.89                                                                 |
| Spike amplitude (mV)            | 63.37 ± 3.16                                                         | 63.84 ± 3.04                                                         | 66.83 ± 2.7                                                                 | 72.07 ± 5.03                                                                |
| Spike half-width (ms)           | 3.31 ± 0.27                                                          | 3.24 ± 0.23                                                          | 3.45 ± 0.16                                                                 | 3.35 ± 0.27                                                                 |
| Max no. of spikes fired         | 5.83 ± 0.75                                                          | 6.72 ± 0.67                                                          | 5 ± 0.41                                                                    | 5.3 ± 1.2                                                                   |

All values are given as mean ± SEM
